# Supplementary material
Source: PubMed Central journal article supplement (PMC3030328)
Supplement: supp_M110.157032_Supplementary_figure_S1-S3_plus_references.pdf [file supp_M110.157032_Supplementary_figure_S1-S3_plus_references.pdf]

### Supplementary figure S1

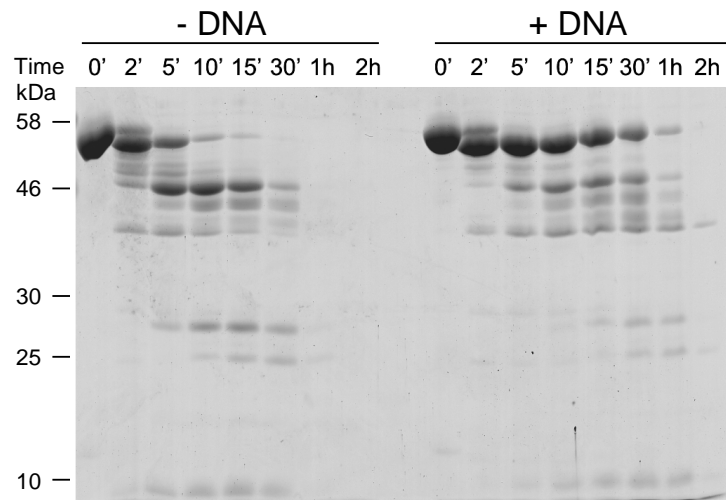

Fig. S1: Time dependent degradation of the GgpS protein by trypsin in absence or presence of DNA. The recombinant GgpS protein was incubated with trypsin ( $20 \text{ ng } \mu\text{l}^{-1}$ ) and at the indicated time points samples were taken and analyzed.

## Supplementary figure S2

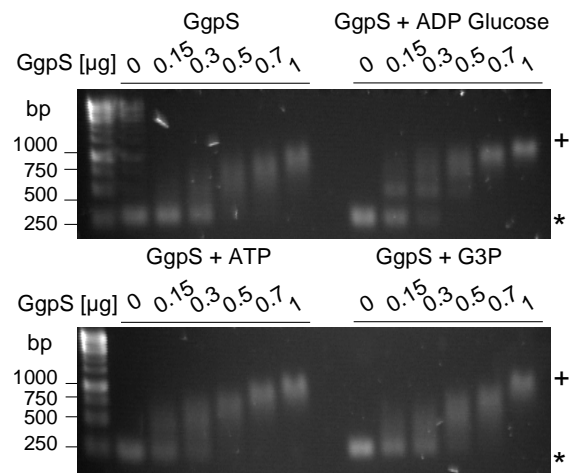

Fig. S2: Impact of substrate binding by GgpS on protein DNA interaction. EMSAs were performed as described for Fig. 5 but the GgpS enzyme was incubated with ADP-Glucose, ATP, or glycerol-3-phosphate (each 3mM) prior to addition of the DNA probe. Free DNA and DNA bound to GgpS is indicated by an asterisks or plus, respectively.

### Supplementary figure S3

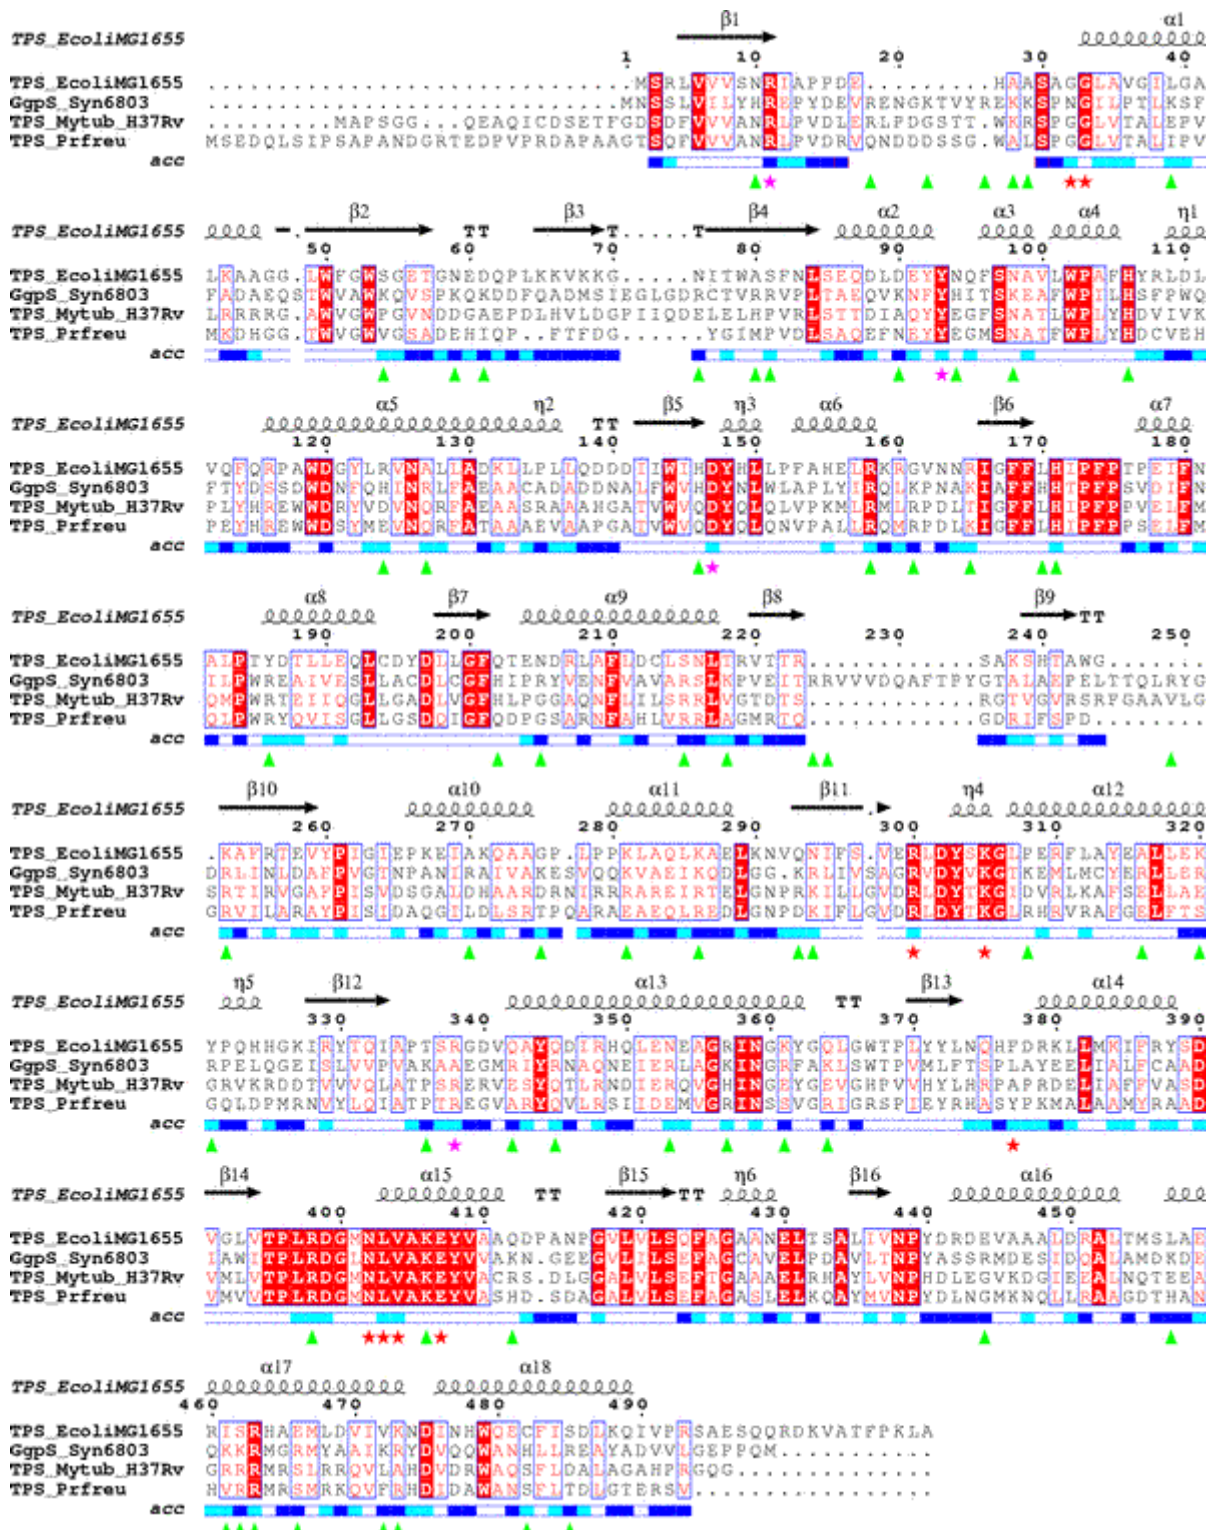

Fig. S3: Structure and sequence comparison of the trehalosephosphate-synthase (TPS) of *E. coli*, *M. tuberculosis* H37Rv and *P. freudenreichii* and GgpS of *Synechocystis* sp. PCC 6803. The secondary structure of TPS (1uqu) was used and accessibility of residues was calculated by using the DSSPcont algorithm (29). Sequence comparison was performed using the ClustalX program (30) and the structure as well as the sequence comparison was visualized by using the ESPrnt 2.2 program (31). Accessibility is indicated by blue color (blue: accessible, light blue intermediate, white: buried). Residues responsible for substrate binding in *E. coli* TPS are indicated by asterisks (glucose-6-phosphate pink, UDP-glucose red). Basic amino acids in GgpS are indicated by green triangles.

## References

29. Carter, P., Andersen, C. A., and Rost, B. (2003) *Nucleic Acids Res* **31**(13), 3293-3295
30. Thompson, J. D., Gibson, T. J., Plewniak, F., Jeanmougin, F., and Higgins, D. G. (1997) *Nucleic Acids Res* **25**(24), 4876-4882
31. Gouet, P., Robert, X., and Courcelle, E. (2003) *Nucleic Acids Res* **31**(13), 3320-3323
